# Supplementary material
Source: PubMed Central journal article supplement (PMC5685911)
Supplement: NIHMS908339-supplement-Supplemental_Material.pdf [file NIHMS908339-supplement-Supplemental_Material.pdf]

## **SUPPLEMENTAL MATERIAL**

### **Upregulation of HERV-K is Linked to Immunity and Inflammation in Pulmonary Arterial Hypertension**

Toshie Saito, Kazuya Miyagawa, Shih-Yu Chen, Rasa Tamosiuniene,  
Lingli Wang, Orr Sharpe, Erik Samayoa, Daisuke Harada,  
Jan-Renier A. J. Moonen, Aiqin Cao, Pin-I Chen, Jan K. Hennigs,  
Mingxia Gu, Caiyun G. Li, Ryan D. Leib, Dan Li, Christopher M. Adams,  
Patricia A. del Rosario, Matthew Bill, Francois Haddad, Jose G. Montoya,  
William H. Robinson, Wendy J. Fantl, Garry P. Nolan, Roham T. Zamanian,  
Mark R. Nicolls, Charles Y. Chiu, Maria E. Ariza, Marlene Rabinovitch

## **Expanded Methods:**

**Human samples (lung tissue and peripheral blood mononuclear cells, pulmonary artery endothelial cells (PAEC), pulmonary artery smooth muscle cells (PASMC), induced pluripotent stem cells (iPSC), iPSC differentiated into endothelial cells (iPSC-EC) from PAH patients and donor controls**

Procurement of the tissues from human subjects was approved by the Administrative Panel on Human Subjects in Medical Research at the PHBI Transplant Procurement Centers (lung tissues) and at Stanford University (for blood) and at Vanderbilt University courtesy of Dr. Eric Austin for some of the fibroblasts used for induced pluripotent stem cells. Written informed consent was received from participants prior to inclusion in the study. Characteristics of PAH patients and healthy controls used in the various studies are provided in Supplemental Tables 1 and 2.

***Lungs (PAH and donor controls):*** Lung tissues from heredity and idiopathic PAH patients and control subjects (unused donor lungs) were provided by the Pulmonary Hypertension Breakthrough Initiative (PHBI), which is funded by NIH/NHLBI and the Cardiovascular Medical Research and Education Fund (CMREF). The tissues were obtained from the PHBI Transplant Procurement Centers at Allegheny Hospital, Pittsburgh, PA, Baylor University, The Cleveland Clinic, Stanford University, University of Alabama at Birmingham, The University of California, San Diego, University of Michigan, and Vanderbilt University and de-identified patient data were obtained via the PHBI Data Coordinating Center at the University of Michigan. The lungs were

processed and stored as described previously<sup>1</sup>. In brief, lung tissues were kept in DMEM media supplemented with antibiotics for up to 24h during transportation from the transplant procurement centers. Small pieces of lung tissues were snap-frozen in liquid nitrogen and stored at -80°C for biochemical experiments or fixed in 10% formaldehyde overnight for immunohistochemistry.

**Pulmonary artery endothelial cells (PAEC), pulmonary artery smooth muscle cells (PASMC), induced pluripotent stem cells (iPSC) and induced pluripotent stem cells differentiated into endothelial cells (iPSC-EC):** Most of the cells were obtained from PAH and control (unused donor) lungs provided by PHBI network. The cells were harvested using standard protocols previously published<sup>2,3</sup> Some of the fibroblasts used for induced pluripotent stem cells were obtained from Vanderbilt University as described before<sup>2,4</sup>.

**Peripheral blood mononuclear cells (PBMC):** PBMC were isolated from blood of PAH patients, provided by the Stanford Human Immune Monitoring Center (HIMC) Biobank (Director: Dr. Gupta; in collaboration with Dr. Zamanian), and from blood of healthy donors, provided by Dr. Montoya. Additional PBMC for the HERV-K dUTPase experiments (experimental samples and assay controls) were isolated from blood obtained from the Stanford Blood Center.

## **Cell isolation and culture**

PAH patient and control cells were obtained described above. Primary pulmonary arterial endothelial cells (PAEC) were also obtained from PromoCell (Heidelberg, Germany). PAEC were cultured in EC media supplemented with 5% fetal bovine serum (FBS), EC growth supplement and penicillin/streptomycin (ScienCell, Carlsbad, CA) and used at passage 3-6. PASMC were cultured in smooth muscle cell media supplemented with 5% fetal bovine serum (FBS), SMC growth supplement and gentamaicin/amphotericin-B (Lonza, Basel, Switzerland) and used at passage 4-10. iPSC and iPS-EC were cultured as described before<sup>4</sup>. PBMC were separated by Ficoll-Paque (GE Healthcare, Pittsburgh, PA) following centrifugation of whole blood at 400 g for 30 min. PBMC ( $1 \times 10^7$ ) were used for further preparation of enriched monocytes. Cells that attached to wells after two hours represented an enriched monocyte preparation. For detection of HERV-K dUTPase in monocytes by qPCR, we used the Pan Monocyte Isolation kit (Miltenyi Biotec, Auburn, CA), according to the manufacturer's protocol. PBMC were cultured with RPMI-1640 (ATCC, Manassas, VA), supplemented with 10% FBS and penicillin/streptomycin.

## **HERV-K dUTPase protein purification**

Recombinant HERV-K dUTPase protein was provided by Dr. Ariza. The *herv-k* gene encoding the dUTPase was cloned into the pTrcHis Topo TA expression vector and the sequence verified by DNA sequencing analysis, as previously described<sup>5</sup>. The purity of the protein was assessed by SDS-PAGE and capillary-liquid chromatography nanospray tandem mass spectrometry (nano-LC/MSMS) performed at the Ohio State

University Mass Spectrometry and Proteomics Facility. Purified dUTPase preparations were routinely tested for contaminating DNA, RNA, lipopolysaccharide and peptidoglycan as previously described<sup>5</sup> to ensure high purity.

### **Treatment of cells with HERV-K dUTPase recombinant protein**

PAEC ( $1 \times 10^6$ ), PBMCs ( $1 \times 10^6$ ), or enriched monocytes (isolated from  $1 \times 10^7$  PBMCs as described above) were used. Cells were incubated with 0.1, 1.0, or 10  $\mu\text{g/ml}$  of recombinant HERV-K dUTPase for 24 hr. Supernatants were collected and used for cytokine measurement by ELISA, and cell lysates were used for western immunoblotting. PBMC were analyzed by single mass cytometry (CyTOF). PAEC were also assayed for apoptosis judged by heightened caspase activity (Caspase-Glo 3/8) (Promega, Madison, WI) during serum withdrawal for 16hrs<sup>2</sup>. PASMNC were assayed for proliferation (MTT proliferation assay, ATCC, Manassas, VA)<sup>6</sup> in response to HERV-K dUTPase for 48 hr.

### **Caspase assay**

Survival of PAEC was assessed by the Caspase 3/7 assay. In some experiments, IL-6 neutralizing antibody (InvivoGen, San Diego, CA) vs. Isotype control (InvivoGen, San Diego, CA) was used to assess whether PAEC apoptosis induced by HERV-K was IL-6 dependent.

**Monoculture of PAEC:** PAEC ( $8 \times 10^3$ ) were seeded in 96-well plate with 5% FBS and allowed to adhere overnight. Cells were incubated with 10  $\mu\text{g/ml}$  of recombinant

HERV-K dUTPase in FBS free media for 16 hr. Cells were assessed with Caspase 3/7 Luciferase Reagent Mix (Promega, Madison, WI), according to the manufacturer's protocol.

**Co-culture of PAEC and Monocytes:** PAEC ( $1 \times 10^5$ ) were seeded in 12-well plates with 5% FBS and allowed to adhere overnight. Pan Monocyte Isolation kit (Miltenyi Biotec, Auburn, CA) was used to isolated monocytes as described above. Then  $5 \times 10^5$  monocytes were pre-treated on a cell culture insert with  $10 \mu\text{g/ml}$  of recombinant HERV-K dUTPase for 2 hr. Then the monocytes were added to the PAEC cultures for 8 hr. After co-culture, the cell culture insert (monocytes) was removed, media of PAEC were changed to serum free media and incubated for 16 hr. Cells were assessed with Caspase 3/7 Luciferase Reagent Mix (Promega, Madison, WI), according to the manufacturer's protocol.

### **MTT Assay**

Proliferation of PASC was assessed by MTT. PASC ( $8 \times 10^3$ ) were seeded in 96-well plates with 5% FBS and allowed to adhere overnight. Cells were incubated with  $10 \mu\text{g/ml}$  of recombinant HERV-K dUTPase in 5% FBS media for 48 hr. Cells were assessed with MTT (ATCC, Manassas, VA), according to the manufacturer's protocol.

### **Treatment with lipopolysaccharide (LPS)**

Monocytes and PAEC cultured as described above were treated with  $1 \mu\text{g/ml}$  LPS for 6 hr and cell lysates were used to assess HERV-K dUTPase mRNA by qPCR.

## **Immunohistochemistry**

Lung tissue sections (approx. 1.2 cm x 1.2 cm) were fixed with 10% formaldehyde (Thermo Scientific, Waltham, MA) and embedded in paraffin (Leica Biosystem, Buffalo Grove, IL). After deparaffinization, sections were permeabilized with 0.2% Triton (Sigma Aldrich, St. Louis, MO). Antigen retrieval was done with either citrate buffer pH 6.0 (Sigma Aldrich, St. Louis, MO) or 1 mM EDTA pH 8.0 (Life Technologies, Grand Island, NY), depending on the primary antibodies. Sections were immersed in 0.3% hydrogen peroxide (Sigma Aldrich, St. Louis, MO) to prevent endogenous peroxidase activity, blocked with 5% goat serum (Jackson ImmunoResearch, West Grove, PA) and incubated with primary antibodies overnight at 4°C, or for one hour at room temperature, depending on the primary antibodies. The following primary antibodies were used: SAMHD1 (1:500, Abcam), CD3 (1:50, Dako), CD19 (1:100, Dako), Plasma Cell (1:100 Dako), Follicular Dendritic cell (FDC) (1:50, Dako), IL6 (1:1000, Abcam). After incubation with secondary antibodies for one hour at RT and amplification with streptavidin-biotin (LSAB2 kit, DAKO, Carpinteria, CA), sections were stained with 3,3'-diaminobenzidine (DAB) and (LSAB2 kit, DAKO, Carpinteria, CA) counterstained with hematoxylin (Vector Laboratories, Burlingame, CA). Images were acquired using a Leica DMLB microscope (Leica, Buffalo Grove, IL).

**Quantification of SAMHD1 staining:** Six PAs and associated perivascular regions were randomly chosen for each sample. SAMHD1-immunostained nuclei were evaluated by the ImmunoRatio<sup>7</sup>, a publicly available automated web-based image analysis program. We used the program to calculate the percentage of DAB-stained

SAMHD1 positive nuclear area relative to the total nuclear area. The average values of six PAs for each sample are shown.

**Quantification of tertiary lymphoid tissue:** Tertiary lymphoid tissue was evaluated by H&E and T cell, B cell, plasma cell and follicular dendritic cell markers. The ratio of PAs with tertiary lymphoid tissue relative to the total number of PAs in each sample was calculated and shown as % of total for each patient and each control.

### **Immunofluorescent staining**

Lung sections (approx. 1.2 cm X 1.2 cm) were fixed with 10% formaldehyde (Thermo Scientific, Waltham, MA) and embedded in paraffin (Leica Biosystem, Buffalo Grove, IL). After deparaffinization, sections were permeabilized with 0.2% Triton (Sigma Aldrich, St. Louis, MO). Antigen retrieval was done with either citrate buffer pH 6.0 (Sigma Aldrich, St. Louis, MO) or 1 mM EDTA pH 8.0 (Life Technologies, Grand Island, NY), depending on the primary antibodies. Sections were blocked with 5% goat serum (Jackson ImmunoResearch, West Grove, PA) and incubated with primary antibodies overnight at 4°C, or for one hour at room temperature, depending on the primary antibodies. The following primary antibodies were used: SAMHD1 (1:500, Abcam), VVF (1:1000, Abcam), CD11c (1:100, Abcam), CD68 (1:100, Dako), CD3 (1:50, Dako), HERV-K env (1:1000, Austral), HERV-K dUTPase (1:2000, provided by Dr. Ariza),  $\alpha$ -Actin (1:400, Sigma Aldrich), followed by incubation with fluorophore-conjugated secondary antibodies (Alexa Fluor 488 anti mouse and Alexa Fluor 594 anti rabbit) for one hour at RT. When double staining with the primary antibodies from same species



was done, Zenon kit (Life technologies, Grand Island, NY) was used for direct labeling of primary antibodies with fluorophores, according to the manufacturer's protocol. Nuclei were stained with DAPI (Vector Laboratories, Burlingame, CA). Images were acquired using a FlouView 1000 (Olympus, Center Valley, PA) or a Leica TCS SP8 (Leica, Buffalo Grove, IL) confocal microscope.

### ***In situ* SAMHD1 antibody production**

To localize SAMHD1 antibody producing cells, frozen lung tissues were fixed with acetone (Sigma Aldrich, St. Louis, MO), blocked with 5% normal goat serum (Jackson ImmunoResearch, West Grove, PA) and incubated with GST-tagged SAMHD1 recombinant protein (Novus Biologicals, Littleton, CO) in PBS (20 µg/ml) overnight at 4°C. Sections were washed with PBS and incubated with FITC-conjugated anti GST antibody (Abcam, 1:800) for one hour at RT. Nuclei were stained with DAPI (Vector Laboratories, Burlingame, CA). Images were acquired using a FlouView 1000 (Olympus, Center Valley, PA) confocal microscope.

### **Immune complex immunoprecipitation and mass spectrometry to identify target antigens**

Immune complexes were captured using a Direct IP kit (Life Technologies, Grand Island, NY), according to the manufacturer's protocol. In brief, 10 µg of C1q (Sigma, St. Louis, MO) was coupled to AminoLink Plus Coupling Resin (Life Technologies, Grand Island, NY). Lung tissue (100mg) was lysed using a dounce homogenizer and 500 µl of lysis buffer (0.025 M Tris HCl pH 7.5, 0.15 M NaCl, 1 mM EDTA, 0.5% NP40,

5% glycerol) with proteinase/phosphatase inhibitors (Life Technologies, Grand Island, NY). After centrifugation at 20,000 g for 20 min at 4°C, the supernatant was collected. The lysates were incubated with C1q coupled resin overnight at 4°C. After the incubation, the beads were washed four times and eluted with 50 µl of IgG Elution Buffer (Life Technologies, Grand Island, NY) for 10 min using gentle vortex and neutralizes with 1 M Tris-HCl pH 9.0. The samples were then prepared using filter aided sample preparation (FASP)<sup>8</sup>. In brief, solubilized proteins in a 4% SDS, 0.1 M DTT, 0.1 M Tris-HCl pH 7.8 were exchanged into first an 8 M urea containing buffer, followed by a 50 mM ammonium bicarbonate buffer on an ultracentrifuge filter. Following a buffer exchange, digestion using trypsin was performed on the membrane filter overnight at 37°C, where peptides were spun out, collected and further cleaned on C18 reverse phase material and analyzed by liquid chromatography (LC) and mass spectrometry (MSMS).

The LC was a NanoLC-2D (Eksigent) where mobile phase A was 99.9% water, 0.1% formic acid and mobile phase B was 99.9% acetonitrile, 0.1% formic acid run at a flow rate of 600 nL/min. The reversed phase C18 column was packed in-house using PEEK C18 3 µM material to a length of 15 cm where the column inner diameter was 100 µM. The source was a Michrom-Bruker Advance Captive Spray with an electrospray potential of 1.7 kV. The mass spectrometer was a LTQ Orbitrap Velos set in data dependent acquisition (DDA) mode, to isolate and fragment the top 12 most intense multiply charged precursor ions. The raw data were converted to .mgf format and searched by Byonic (Protein Metrics) using typical search conditions and a

1% False Discovery Rate determined using the standard reverse decoy strategy. Byonic output files were further analyzed using custom scripts developed in Matlab to aid in data visualization. We excluded proteins where we did not observe at least 3 peptides in at least one sample. Common contaminants were also excluded. For all other proteins, control and PAH patient data were assed using significance analysis of microarray (SAM) to determine q values with a false discovery rate (FDR) cutoff of 5%<sup>9</sup>.

### **Quantification of SAMHD1 specific Immune complexes**

Lung tissue (100 mg) was lysed using a dounce homogenizer and 500  $\mu$ l of lysis buffer (0.025 M Tris-HCl pH 7.5, 0.15 M NaCl, 1 mM EDTA, 0.5% NP40, 5% glycerol) with proteinase/phosphatase inhibitors (Life Technologies, Grand Island, NY). After centrifugation at 20,000 g for 20 min at 4°C, total protein concentration of the supernatant was measured and diluted in PBS to 1  $\mu$ g/ $\mu$ l total protein. ELISA plates were coated with 0.02 mg/mL SAMHD1 antibody (Abcam) in PBS overnight at 4°C. The plates were blocked with 5% BSA in PBS for one hour. Lung lysate was applied and incubated for two hours. HRP-conjugated species-specific anti human IgG (GE Healthcare, 1:10000) added to the plates, and incubated for one hour at room temperature. Tetramethylbenzidine substrate (R&D, Minneapolis, MN) was added for 15 min, then the reaction was stopped with 2 N sulfuric acid (R&D, Minneapolis, MN), and OD values were determined at 450 nm.

### **Western immunoblotting**

Lung lysates (50 mg) were prepared by homogenization with 500  $\mu$ l of modified RIPA buffer (50 mM Tris-HCl pH 7.4, 150 mM NaCl, 1 mM EDTA, 1% Triton X-100, 0.1% SDS, 1% Sodium deoxycholate, 1 mM PMSF) containing protease and phosphatase inhibitors (Life Technologies, Grand Island, NY). After centrifugation at 20,000 g for 20 min at 4°C, the supernatant was collected. Protein concentration was determined by BCA. Equal amounts of protein were loaded on a precast NuPage 4-12% Bis-Tris (Life Technologies) gel and subjected to electrophoresis under reducing conditions and electrotransferred onto polyvinylidene difluoride (PVDF) membranes. After blocking with 5% milk in 0.5% Tween-PBS, membranes were incubated with primary antibodies against SAMHD1 (1:500, Abcam), pSTAT3 (1:1000, Invitrogen), STAT3 (1:1000, Invitrogen),  $\beta$ -Actin (1:10000, Santa Cruz Biotechnology),  $\alpha$ -Tubulin (1:2000, Sigma Aldrich). Anti mouse IgG secondary antibody (1:5000, Santa Cruz Biotechnology) was used. After incubation with HRP-conjugated secondary antibodies, signals were visualized with ECL or ECL prime (GE Healthcare, Pittsburgh, PA).

### **Enzyme-linked immunosorbent assay (ELISA)**

Cytokine levels in human enriched monocytes, human PAEC, and rat lung lysates were measured using the Quantikine ELISA kit (R&D, Minneapolis, MN) for human TNF $\alpha$ , IL1 $\beta$  and IL6, and for rat IL6 (LSBio, Seattle, WA), according to the manufacturer's protocol.

### **Quantitative (q)PCR**

Total RNA was extracted and purified from lung tissue or cells using spin column based kits (Qiagen, Valencia, CA, or Zymo Research, Irvine, CA). RT-PCR was performed according to the manufacture's protocol (Applied Biosystems, Grand Island, NY). qPCR was performed with a 7900HT Sequence Detection System (Applied Biosystems, Foster, CA) or a CFX384 Real Time System (BioRad, Hercules, CA). Primers used: TaqMan Gene Expression Assays, ( $\beta$ -actin (Hs01060665\_g1), HERV-K(II) env (PN4441114, custom probe, Applied Biosystems) and Syber Green assays, HERV-K dUTPase (Forward, 5'-AAATGGGCAACCATTGTCGGGAAACGAGC-3'; Reverse, 5'-TAGTACAT AAATCTACTGCTGCACTGC-3),  $\beta$ -actin (Forward, 5'-CATGCCATCCTGCGTCTGGA-3'; Reverse, 5'-CCGTGGCCATCTCTTGCTCG).

### **Unbiased pan-viral metagenomic next-generation sequencing**

A 0.5 cm<sup>3</sup> piece of previously snap frozen lung tissue was placed in a 2 mL tube with RLT Buffer (Qiagen, Hilden, Germany) and 0.1 mm silica beads (MPBiomedicals, Solon OH). Next, the samples were homogenized using an Omni Bead Ruptor (Omni Intl, Kennesaw, GA), and cellular debris was pelleted. Total RNA was extracted using the EZ1 RNA Universal Tissue kit (Qiagen, Hilden, Germany). An on-instrument DNase treatment was performed to minimize any background genomic DNA, followed by enrichment for polyadenylated mRNA using OligoTex (Qiagen, Hilden, Germany). Nucleic acid samples were randomly amplified to generate a cDNA library as previously described<sup>10</sup>, and the quality and size distributions of the libraries were examined by 2% agarose gel electrophoresis. Metagenomic sequencing libraries were then generated

using a modified Illumina TruSeq protocol<sup>10</sup>. The BioAnalyzer High-Sensitivity DNA kit (Agilent, Santa Clara, CA) was used to assess library size and the Kapa Universal qPCR kit (Kapa Biosystems, Woburn, MA) was used to quantitate the library concentration. After validation, samples were sequenced on an Illumina MiSeq instrument using 300/200 base pair (bp) paired-end sequencing. Approximately 18.3 million sequencing reads were analyzed using a modified version of SURPI (Sequence-Based Ultra-Rapid Pathogen Identification)<sup>11</sup>, a computational pipeline for detection of microbes, including viruses, from next-generation sequencing data. Briefly, after detection of viral sequences aligning to human endogenous retroviruses (HERVs) with an initial run using SURPI, the pipeline was rerun with the following modifications: (1) raw sequencing reads were preprocessed by adapter trimming and low-quality / low-complexity filtering (generating ~1.3 to 3.5 million reads per sample), (2) the human computational subtraction step was skipped to retain human endogenous viral sequences, and (3) preprocessed reads were aligned to the viral portion of the NCBI (National Center for Biotechnology Information) NT database to detect HERV sequences. Viral reads were identified as HERVs using a stringent edit distance requirement of 0 (no mismatches) across 75 bp of sequence. HERV reads were also taxonomically classified to the appropriate rank (family, genus, species, or subspecies/strain) by use of an in-house developed classification algorithm using the SNAP nucleotide aligner (v0.15)<sup>11</sup>. Heat maps were generated using matrix2png<sup>12</sup>.

### **CyTOF (single cell mass cytometry)**

Details of the CyTOF method were described previously<sup>13</sup>. In brief, PBMC were stained with metal-conjugated antibodies (listed below) and analyzed with a mass cytometer. A subset of the antibodies was obtained pre-labeled by Fluidigm (San Francisco, CA) and others were conjugated with metals in-house, using MaxPAR antibody conjugation kit (Fluidigm, San Francisco, CA).  $1 \times 10^6$  cells were used for each sample. After staining with cisplatin for viability evaluation<sup>14</sup>, cells were treated with 0.02% Saponin (Sigma, St. Louis, MO) in cell staining media (CSM, low barium PBS with 0.5% BSA, 0.02% NaN<sub>3</sub>), then stained with barcoding dye for 15 min for identification, to enable pooling for processing and measurement as a single multiplexed sample<sup>13</sup>. Cells were stained with surface markers for one hr at room temperature. After permeabilization with methanol for 10 min at 4°C, cells were stained with intracellular markers for one hr at room temperature, then with DNA intercalator (Fluidigm, South San Francisco, CA) overnight at 4°C. Cells were washed with CSM twice between individual steps and washed three times with MilliQ water before the samples were analyzed with mass cytometer (CyTOF2, Fluidigm, South San Francisco, CA). Stained cells were analyzed on mass cytometer at event rate of 400-500 cells per second. Data files were concatenated. The data were normalized using NormalizerR2013b and de-barcoded using the Matlab DebarcoderR2013b. Gating was performed in <http://nolanlab.cytobank.org><sup>15</sup>. The data were transformed to arcsinh values by taking the inverse hyperbolic sine of the raw data. The arcsinh ratio is the difference between the median arcsinh values of the two samples. For Figure 2D, all the data from PAH and controls are shown as arcsinh ratio

over assay control. For Figure 4F, the data shows HERV-K dUTPase-treated over untreated (control) PBMCs (Stanford Blood Bank).

### CyTOF antibodies:

#### (i) PAH vs. control samples

| Isotope | Antigen | Clone   | Supplier                              |
|---------|---------|---------|---------------------------------------|
| Y 89    | CD45    | HI30    | Fluidigm, South San Francisco, CA     |
| Er 170  | CD3     | UCHT1   | Fluidigm, South San Francisco, CA     |
| Nd 142  | CD19    | HIB19   | Fluidigm, South San Francisco, CA     |
| Yb 176  | CD7     | M-T701  | BD Biosciences, San Jose, CA          |
| Nd 143  | CD11c   | Bu15    | Biolegend, San Diego, CA              |
| Gd 160  | CD14    | M5E2    | Biolegend, San Diego, CA              |
| Bi 209  | CD16    | 3G8     | Fluidigm, South San Francisco, CA     |
| In 115  | HLADR   | L243    | Trace Sciences, Richmond Hill, Canada |
| Pr 141  | cPARP   | F21-852 | BD Biosciences, San Jose, CA          |

#### (ii) HERV-K dUTPase treatment of PBMC

| Isotope | Antigen  | Clone   | Phosphorylation site | Supplier                          |
|---------|----------|---------|----------------------|-----------------------------------|
| In 115  | CD45     | HI30    | N/A                  | Biolegend, San Diego, CA          |
| Er 170  | CD3      | UCHT1   | N/A                  | Fluidigm, South San Francisco, CA |
| Nd 142  | CD19     | HIB19   | N/A                  | Fluidigm, South San Francisco, CA |
| Yb 174  | HLADR    | L243    | N/A                  | Fluidigm, South San Francisco, CA |
| Dy 162  | CD69     | FN50    | N/A                  | Fluidigm, South San Francisco, CA |
| Pr 141  | Caspase3 | C92-605 | N/A                  | BD Biosciences, San Jose, CA      |



| Isotope | Antigen   | Clone         | Phosphorylation site | Supplier                               |
|---------|-----------|---------------|----------------------|----------------------------------------|
| Eu 153  | pSTAT1    | 58D6          | pY701                | Fluidigm, South San Francisco, CA      |
| Gd 156  | pSTAT3    | 4             | pY705                | BD Biosciences, San Jose, CA           |
| Dy 164  | pSTAT5    | 47            | pY694                | BD Biosciences, San Jose, CA           |
| Gd 158  | pMAPKAPK2 | 27B7          | pT334                | Cell Signaling Technology, Danvers, MA |
| Sm 149  | pNFkB     | K10-895.12.50 | pS529                | BD Biosciences, San Jose, CA           |
| Sm 152  | pAKT      | D9E           | pS473                | Fluidigm, South San Francisco, CA      |
| Er 167  | pERK      | D13.14.4E     | pT202/Y204           | Fluidigm, South San Francisco, CA      |

N/A, not applicable

### **Rat model for the induction of pulmonary hypertension by HERV-K dUTPase**

The experimental protocol used in this study was approved by the Animal Care Committee at Stanford University following the published guidelines of the National Institutes of Health and the American Physiological Society. Adult male Sprague-Dawley rats (7 wks, 180-200 g) were randomly assigned to a control or treatment group. Rats were either untreated or given a single subcutaneous dose of SU5416 (20 mg/kg body weight) one day prior to the first of three weekly intravenous injections of HERV-K dUTPase (0.2 mg/kg body weight). Rats in the control group were treated with saline vehicle. Twenty-one days after the first HERV-K dUTPase injection, cardiac function, right ventricular systolic pressure and right ventricular hypertrophy were assessed as previously described<sup>1</sup>. In brief, cardiac function was measured by Vivid 7 ultrasound machine (GE Healthcare, Pittsburgh, PA) and 13-MHz linear array transducer. RVSP

was measured by inserting 1.4F Millar catheter (Millar Instruments, Houston, TX) via right jugular vein. Pressure measurements were repeated three times. Data were collected by Power Lab Data Acquisition system (AD Instruments, Colorado Springs, CO) and analyzed by LabChart software (AD Instruments, Colorado Springs, CO). Right ventricular hypertrophy was assessed by the weight ratio of the RV to LV plus septum. Isoflurane anesthesia (1.5%, 1 liter/min oxygen) was used during these procedures. After hemodynamic measurements, the lungs were flushed with saline. Right lungs were snap-frozen in liquid nitrogen and stored at  $-80^{\circ}\text{C}$  for ELISA. Left lungs were fixed with 10% formalin for histology. For histology, staining methods are described above. Images were acquired using Leica DMLB microscope (Leica, Buffalo Grove, IL). Quantification of muscularization and arterial number relative to alveoli was conducted in a blinded manner as described below. For IL6 measurement by ELISA, 20  $\mu\text{g}$  of tissues was homogenized per the manufacturer's protocol. After centrifugation, total protein concentration of supernatant was measured and prepared in PBS at 0.5  $\mu\text{g}/\mu\text{L}$  total protein.

### **Quantification of Immunohistochemistry**

***Evaluation of muscularized arteries:*** To evaluate the distal pulmonary arteries (DPAs) at alveolar duct and alveolar wall level, we counted DPAs in six randomly chosen low magnification (200X) fields per rat, in the SMA and vWF double stained immunofluorescent images. The artery was defined as muscularized if a thick double line of SMA staining was observed in multiple areas. The ratio of muscularized DPAs over total DPAs was calculated.

**Loss of distal vessels:** We counted DPAs as described above and alveoli in six randomly chosen low magnification (200X) fields per rat in Movat stained sections, and calculated the ratio of total counted DPAs over total alveoli.

### **Statistical Analysis**

Data were analyzed using Prism 6.0 (GraphPad Software, La Jolla, CA). Statistical significance was determined by one-way ANOVA followed by Dunnett's test or Tukey's test of multiple comparisons when more than two groups were being compared. When only two groups were compared, we used Student's t-test. For some experiments, as indicated in the figure legends, we applied the Welch or Mann Whitney test depending on the data distribution, i.e., when the distribution was not normal we used the Mann-Whitney and when the variance was unequal by F-test, we used the Welch. A P-value of <0.05 was considered significant. Data are shown as mean  $\pm$  SEM or median with interquartile range depending on the test applied. For target identification of immune complexes by mass spectrometry, significance analysis of microarray (SAM) was applied with false discovery rate (FDR) cutoff of 5%<sup>9</sup>. For signaling data by CyTOF, Bonferroni-adjusted P-value ( $P=7.14 \times 10^{-3}$ ) was applied to signaling response with arcsinh ratio  $>|0.2|^{13}$ .

### **Accession Numbers**

Next-generation sequencing data with human sequences removed, using BLASTn to the human genome at a low-stringency cutoff of  $10^{-5}$  have been publicly deposited in the NIH Sequence Read Archive (SRA accession number SRP056561).

## Supplemental Tables:

Supplemental Table 1: Characteristics of PAH patients

| Patient | PAH Diagnosis <sup>a</sup> | Age - Gender | Race    | PAP <sup>b</sup> mean (mmHg) | PVR <sup>c</sup> (Wood Units) | 6 Min <sup>d</sup> Walk (m) | PAH Medications <sup>e</sup>                                  | Study                                       |
|---------|----------------------------|--------------|---------|------------------------------|-------------------------------|-----------------------------|---------------------------------------------------------------|---------------------------------------------|
| PAH-01  | HPAH (BMP2 mutation)       | 33-F         | AA      | 48                           | 15.57                         | 326                         | epoprostenol, bosentan, sildenafil, treprostinil              | tLTs, IHC, qPCR (lung, PAEC, iPSC, iPSC-EC) |
| PAH-02  | HPAH                       | 47-M         | White   | 62                           | 11.95                         | 282                         | bosentan, sildenafil, epoprostenol                            | SAMHD1 IC                                   |
| PAH-03  | IPAH                       | 39-F         | Asian   | 47                           | N/A                           | 161                         | epoprostenol, bosentan, ambrisentan, sildenafil               | SAMHD1 IC, WB, viral screen                 |
| PAH-04  | IPAH                       | 58-F         | White   | 50                           | N/A                           | 206                         | bosentan, treprostinil, sildenafil, epoprostenol              | tLT, SAMHD1 IC                              |
| PAH-05  | IPAH                       | 28-F         | White   | 37                           | 6.38                          | 434                         | sildenafil, epoprostenol, bosentan                            | tLT, SAMHD1 IC                              |
| PAH-06  | IPAH                       | 27-F         | AA      | 55                           | N/A                           | 316                         | sildenafil, treprostinil (inhaled)                            | tLT, SAMHD1 IC                              |
| PAH-07  | IPAH                       | 16-F         | White   | 80                           | N/A                           | 348                         | bosentan, ambrisentan, epoprostenol, sildenafil, treprostinil | tLT                                         |
| PAH-08  | IPAH                       | 41-F         | Unknown | 43                           | N/A                           | 335                         | treprostinil, bosentan, sildenafil                            | tLT                                         |
| PAH-09  | IPAH                       | 40-F         | White   | 47                           | N/A                           | 294                         | ambrisentan, sildenafil, iloprost, epoprostenol               | tLT                                         |
| PAH-10  | IPAH                       | 29-F         | AA      | 41                           | N/A                           | 339                         | epoprostenol, ambrisentan, sildenafil                         | SAMHD1 IC                                   |
| PAH-11  | IPAH                       | 24-M         | Asian   | 48                           | 9.56                          | 356                         | sildenafil, ambrisentan, epoprostenol, bosentan               | SAMHD1 IC                                   |
| PAH-12  | HPAH                       | 56-F         | White   | 75                           | N/A                           | 372                         | epoprostenol, bosentan, ambrisentan, sildenafil               | SAMHD1 IC, MS                               |

| Patient | PAH Diagnosis <sup>a</sup>        | Age - Gender | Race  | PAP <sup>b</sup> mean (mmHg) | PVR <sup>c</sup> (Wood Units) | 6 Min <sup>d</sup> Walk (m) | PAH Medications <sup>e</sup>                  | Study                                                  |
|---------|-----------------------------------|--------------|-------|------------------------------|-------------------------------|-----------------------------|-----------------------------------------------|--------------------------------------------------------|
| PAH-13  | IPAH                              | 49-F         | White | 75                           | 16.76                         | 326                         | ambrisentan, sildenafil, epoprostenol         | tLT, SAMHD1 IC, MS, WB, IHC, viral screen, qPCR (lung) |
| PAH-14  | HPAH (BMP2 mutation)              | 27-F         | White | 69                           | 12.11                         | 360                         | sildenafil, treprostinil bosentan iloprost    | qPCR (lung, PAEC, PASMC)                               |
| PAH-15  | IPAH                              | 45-M         | White | 48                           | 11.08                         | 293                         | treprostinil bosentan sildenafil epoprostenol | SAMHD1 IC.                                             |
| PAH-16  | HPAH (BMP2 mutation)              | 33-F         | White | 48                           | 9.74                          | 288                         | bosentan treprostinil sildenafil epoprostenol | SAMHD1 ICs, qPCR (lung, PASMC)                         |
| PAH-17  | IPAH                              | 15-F         | White | 102                          | 25.24                         | 387                         | sildenafil epoprostenol                       | tLT, qPCR (lung)                                       |
| PAH-18  | HPAH (SMAD9 mutation) +APAH (CHD) | 16-F         | Asian | 92                           | 16.15                         | 512                         | sildenafil treprostinil bosentan epoprostenol | tLT, SAMHD1 IC, WB, IHC, viral screen, qPCR (lung)     |
| PAH-19  | IPAH                              | 25-F         | Asian | 87                           | 20.96                         | 201                         | epoprostenol sildenafil bosentan              | tLTs, qPCR (lung)                                      |
| PAH-20  | IPAH                              | 55-F         | AA    | 53                           | 12.29                         | 273                         | sildenafil bosentan epoprostenol              | tLTs, SAMHD1 IC, MS, IHC, qPCR (lung)                  |
| PAH-21  | IPAH                              | 25-M         | White | 36                           | N/A                           | 511                         | epoprostenol sildenafil treprostinil          | SAMHD1 IC, WB, qPCR                                    |
| PAH-22  | IPAH                              | 56-F         | White | 57                           | 11.41                         | 137                         | sildenafil ambrisentan treprostinil           | SAMHD1 IC, qPCR (PAEC, iPSC, iPSC-EC)                  |
| PAH-23  | IPAH                              | 41-F         | White | 55                           | 9.84                          | 472                         | sildenafil bosentan epoprostenol              | tLTs, SAMHD1 IC, WB, viral screen, qPCR (lung, PAEC)   |
| PAH-24  | IPAH                              | 58-F         | White | 47                           | 12.66                         | 642                         | bosentan sildenafil                           | CyTOF                                                  |
| PAH-25  | IPAH                              | 27-F         | White | 27                           | 5.26                          | 707                         | tadalafil                                     | CyTOF                                                  |
| PAH-26  | IPAH                              | 47-F         | AA    | 47                           | 5.5                           | 344                         | treprostinil (inhaled) tadalafil              | CyTOF                                                  |

| Patient | PAH Diagnosis <sup>a</sup> | Age - Gender | Race    | PAP <sup>b</sup> mean (mmHg) | PVR <sup>c</sup> (Wood Units) | 6 Min <sup>d</sup> Walk (m) | PAH Medications <sup>e</sup>                                                                                           | Study                      |
|---------|----------------------------|--------------|---------|------------------------------|-------------------------------|-----------------------------|------------------------------------------------------------------------------------------------------------------------|----------------------------|
| PAH-27  | IPAH                       | 36-M         | Asian   | 70                           | 12.7                          | 488                         | treprostinil (inhaled)<br>ambrisentan<br>sildenafil                                                                    | CyTOF                      |
| PAH-28  | IPAH                       | 27-F         | White   | 40                           | 7.82                          | 548                         | treprostinil (inhaled)<br>sildenafil                                                                                   | CyTOF                      |
| PAH-29  | IPAH                       | 36-M         | Other   | 44                           | 7.17                          | 481                         | tadalafil                                                                                                              | CyTOF                      |
| PAH-30  | IPAH                       | 29-F         | White   | 53                           | 8.95                          | 590                         | treprostinil (subcutaneous)<br>tadalafil                                                                               | CyTOF                      |
| PAH-31  | IPAH                       | 50-F         | White   | 40                           | 5.99                          | 550                         | ambrisentan<br>sildenafil                                                                                              | CyTOF                      |
| PAH-32  | IPAH                       | 46-F         | AA      | 52                           | 10.25                         | 572                         | None                                                                                                                   | CyTOF                      |
| PAH-33  | IPAH                       | 36-F         | Asian   | 33                           | 3.83                          | 594                         | treprostinil (inhaled)<br>tadalafil                                                                                    | CyTOF                      |
| PAH-34  | IPAH                       | 46-F         | Asian   | 57                           | 13.69                         | 518                         | epoprostenol<br>sildenafil                                                                                             | qPCR (monocytes)           |
| PAH-35  | IPAH                       | 35-F         | White   | 61                           | 26.96                         | 366                         | None                                                                                                                   | qPCR (monocytes)           |
| PAH-36  | IPAH                       | 53-F         | White   | 50                           | 12.6                          | 238                         | None                                                                                                                   | qPCR (monocytes)           |
| PAH-37  | IPAH                       | 20-F         | White   | 33                           | 6.84                          | 675                         | ambrisentan<br>tadalafil                                                                                               | qPCR (monocytes)           |
| PAH-38  | IPAH                       | 46-F         | White   | 58                           | 11.11                         | 232                         | treprostinil (inhaled)<br>sildenafil                                                                                   | qPCR (monocytes)           |
| PAH-39  | IPAH                       | 40-M         | White   | 64                           | 73                            | 420                         | sildenafil,<br>ambrisentan,<br>treprostinil                                                                            | qPCR (PAEC, iPSC, iPSC-EC) |
| PAH-40  | IPAH                       | 11-F         | White   | 95                           | N/A                           | 244                         | sildenafil,<br>ambrisentan,<br>epoprostenol,<br>treprostinil                                                           | qPCR (PASMC)               |
| PAH-41  | IPAH                       | 39-F         | Unknown | 69                           | 14.97                         | 262                         | sildenafil,<br>bosentan<br>iloprost,<br>epoprostenol                                                                   | qPCR (PAEC, iPSC, iPSC-EC) |
| PAH-42  | HPAH                       | 37-M         | White   | 77                           | 14.22                         | 309                         | sildenafil,<br>sitaxsentan,<br>ambrisentan,<br>epoprostenol,<br>Imatinib (investigational medication),<br>treprostinil | qPCR (PASMC)               |
| PAH-43  | HPAH (BMP2 Mutation)       | N/A -M       | White   | N/A                          | N/A                           | N/A                         | N/A                                                                                                                    | qPCR (iPSC)                |

| Patient | PAH Diagnosis <sup>a</sup> | Age - Gender | Race  | PAP <sup>b</sup> mean (mmHg) | PVR <sup>c</sup> (Wood Units) | 6 Min <sup>d</sup> Walk (m) | PAH Medications <sup>e</sup> | Study       |
|---------|----------------------------|--------------|-------|------------------------------|-------------------------------|-----------------------------|------------------------------|-------------|
| PAH-44  | HPAH (BMP2 Mutation)       | N/A -F       | White | N/A                          | N/A                           | N/A                         | N/A                          | qPCR (iPSC) |
| PAH-45  | HPAH (BMP2 Mutation)       | N/A -F       | White | N/A                          | N/A                           | N/A                         | N/A                          | qPCR (iPSC) |

<sup>a</sup> Diagnosis: Pulmonary arterial hypertension (PAH) classification: IPAH, Idiopathic PAH; HPAH, hereditary PAH, known mutation as stated; APAH, Associated PAH; CHD, congenital heart disease

<sup>b</sup> PAP, Mean pulmonary arterial pressure. Data were obtained from catheterization study performed closest to transplantation or blood draw.

<sup>c</sup> PVR, Pulmonary vascular resistance. Data were obtained from catheterization study performed closest to transplantation or blood draw.

<sup>d</sup> 6 Min Walk = distance walked in six minutes. Data were obtained from study performed closest to transplantation or blood draw.

<sup>e</sup> PAH medications: For samples provided by the PAH biobank (CyTOF experiments) we list current medications at the time of blood draw. All others, medications are listed according to total drug exposure during treatment period up to transplantation, not necessarily in combination.

AA, African American

IHC, immunohistochemistry of SAMHD1

MS, complement 1q (C1q) mass spectroscopy

NA, data not available

qPCR (lung), evaluation of HERV-K(II) envelope and HERV-K dUTPase in the lung, by qPCR

qPCR (monocytes, PAEC, PASMC, iPSC, iPSC-EC), evaluation of HERV-K dUTPase in this cell type, by qPCR

SAMHD1 ICs, immunohistochemistry of SAMHD1 in ICs

tLTs, immunohistochemistry to detect tertiary lymphoid tissues

Viral screen, screen for HERV-K viruses

WB, expression of SAMHD1 assayed by western immunoblot

CytoF, single cell mass cytometry

## Supplemental Table 2: Characteristics of Controls (unused donor lungs or healthy volunteers)

For definitions, see Supplemental Table 1.

| Patient | Age - Gender | Race    | Cause of Death                                                                            | Study                                              |
|---------|--------------|---------|-------------------------------------------------------------------------------------------|----------------------------------------------------|
| CON-01  | 18-M         | White   | Gunshot wound to the head                                                                 | SAMHD1 IC                                          |
| CON-02  | 26-M         | White   | Cerebrovascular accident/Stroke                                                           | tLT, SAMHD1 IC                                     |
| CON-03  | 14-M         | White   | Gun shot wound to head                                                                    | tLT                                                |
| CON-04  | 55-M         | White   | Anoxia/cardiovascular/natural causes                                                      | SAMHD1 IC, WB                                      |
| CON-05  | 14-M         | White   | Cardiac arrest secondary to diabetic ketoacidosis                                         | tLT                                                |
| CON-06  | 54-F         | White   | Cerebrovascular accident /stroke                                                          | qPCR (lung)                                        |
| CON-07  | 28-F         | White   | Anoxia following motor vehicle accident                                                   | tLT, SAMHD1 IC, WB, IHC, viral screen, qPCR (lung) |
| CON-08  | 62-M         | White   | Cerebrovascular/ intercranial hemorrhage/stroke                                           | SAMHD1 IC                                          |
| CON-09  | 47-M         | White   | Motor vehicle accident                                                                    | qPCR (lung, PAEC, iPSC-EC, iPSC)                   |
| CON-10  | 56-F         | White   | Cerebrovascular accident                                                                  | tLT, IHC, qPCR (lung)                              |
| CON-11  | 49-F         | White   | Intracranial hemorrhage                                                                   | qPCR                                               |
| CON-12  | 30-M         | White   | Head trauma due to motor vehicle accident                                                 | tLT, IHC, qPCR (lung)                              |
| CON-13  | 55-F         | Unknown | Intracranial stroke/hemorrhage                                                            | tLT, qPCR (lung, PAEC)                             |
| CON-14  | 12-M         | AA      | Brain death/cerebral edema/diabetic ketoacidosis/diabetes-type1                           | tLT                                                |
| CON-15  | 40-F         | White   | Extensive intracranial injury/subarachnoid hemorrhage secondary to motor vehicle accident | Viral screen                                       |
| CON-16  | 45-F         | White   | Cerebrovascular accident/ subarachnoid hemorrhage                                         | SAMHD1 IC                                          |
| CON-17  | 25-M         | White   | Cerebrovascular/ intracranial hemorrhage/stroke                                           | tLT, IHC, qPCR (lung)                              |



| Patient | Age - Gender | Race       | Cause of Death                                                              | Study                                             |
|---------|--------------|------------|-----------------------------------------------------------------------------|---------------------------------------------------|
| CON-18  | 60-M         | White      | Type A aortic dissection with brain death                                   | SAMHD1 IC, WB                                     |
| CON-19  | 54-M         | White      | Choking with anoxic brain injury                                            | SAMHD1 IC                                         |
| CON-20  | 41-F         | White      | Grade 4 subarachnoid hemorrhage, ruptured anterior cerebral artery aneurysm | tLT, SAMHD1 IC, MS, WB, viral screen, qPCR (lung) |
| CON-21  | 17-M         | White      | Head injury progression to brain death secondary to motor vehicle accident  | tLT                                               |
| CON-22  | 49-M         | White      | Intracranial hemorrhage                                                     | SAMHD1 IC, MS, WB                                 |
| CON-23  | 43-M         | White      | Fatal gun shot to head                                                      | tLT, SAMHD1 IC                                    |
| CON-24  | 19-M         | White      | Anoxic brain injury                                                         | tLT, MS, viral screen, qPCR (lung)                |
| CON-25  | 19-M         | AA         | Anoxia of brain                                                             | tLT, SAMHD1 IC                                    |
| CON-26  | 52-F         | White      | Hypoxic brain death                                                         | tLT                                               |
| CON-27  | 59-F         | White      | N/A – Healthy volunteer                                                     | CyTOF                                             |
| CON-28  | 27-F         | White      | N/A – Healthy volunteer                                                     | CyTOF                                             |
| CON-29  | 47-F         | White      | N/A – Healthy volunteer                                                     | CyTOF                                             |
| CON-30  | 36-M         | Asian      | N/A – Healthy volunteer                                                     | CyTOF                                             |
| CON-31  | 28-F         | White      | N/A – Healthy volunteer                                                     | CyTOF                                             |
| CON-32  | 36-M         | White      | N/A – Healthy volunteer                                                     | CyTOF                                             |
| CON-33  | 46-F         | White      | N/A – Healthy volunteer                                                     | CyTOF                                             |
| CON-34  | 51-F         | AA & White | N/A – Healthy volunteer                                                     | CyTOF                                             |
| CON-35  | 30-F         | White      | N/A – Healthy volunteer                                                     | qPCR (monocytes)                                  |
| CON-36  | 35-F         | Asian      | N/A – Healthy volunteer                                                     | qPCR (monocytes)                                  |
| CON-37  | 52-F         | White      | N/A – Healthy volunteer                                                     | qPCR (monocytes)                                  |

| Patient | Age - Gender | Race  | Cause of Death            | Study                              |
|---------|--------------|-------|---------------------------|------------------------------------|
| CON-38  | 46-F         | White | N/A – Healthy volunteer   | qPCR (monocytes)                   |
| CON-39  | 57M          | White | N/A – Healthy volunteer   | qPCR (monocytes)                   |
| CON-40  | 45-M         | White | Anoxia                    | qPCR (PAEC, iPSC-EC, iPSC)         |
| CON-41  | 43-F         | White | Cerebrovascular/Stroke    | qPCR (PAEC, iPSC-EC, iPSC, PASMCM) |
| CON-42  | 33-F         | White | Head trauma. Blunt injury | qPCR (PAEC, iPSC-EC, iPSC)         |
| CON-43  | 1-M          | White | Anoxia/Drowning           | MTT (PASMCM)                       |
| CON-44  | 46-M         | Asian | Cerebrovascular/Stroke    | qPCR (PASMCM)                      |
| CON-45  | 36-F         | White | Subarachnoid hemorrhage   | qPCR (PASMCM)                      |
| CON-46  | 51-M         | White | Cerebrovascular accident  | qPCR (PAEC)                        |
| CON-47  | N/A - M      | White | N/A                       | qPCR (iPSC)                        |
| CON-48  | N/A – F      | White | N/A                       | qPCR (iPSC)                        |
| CON-49  | N/A - F      | White | N/A                       | qPCR (iPSC)                        |

## Supplemental Figures and Legends:

**Supplemental Figure 1: Gating strategy for classical dendritic cells (cDC) or B-cells of PAH patients and controls, used in the experiments shown in Figures 2D, 4E and 4F.**

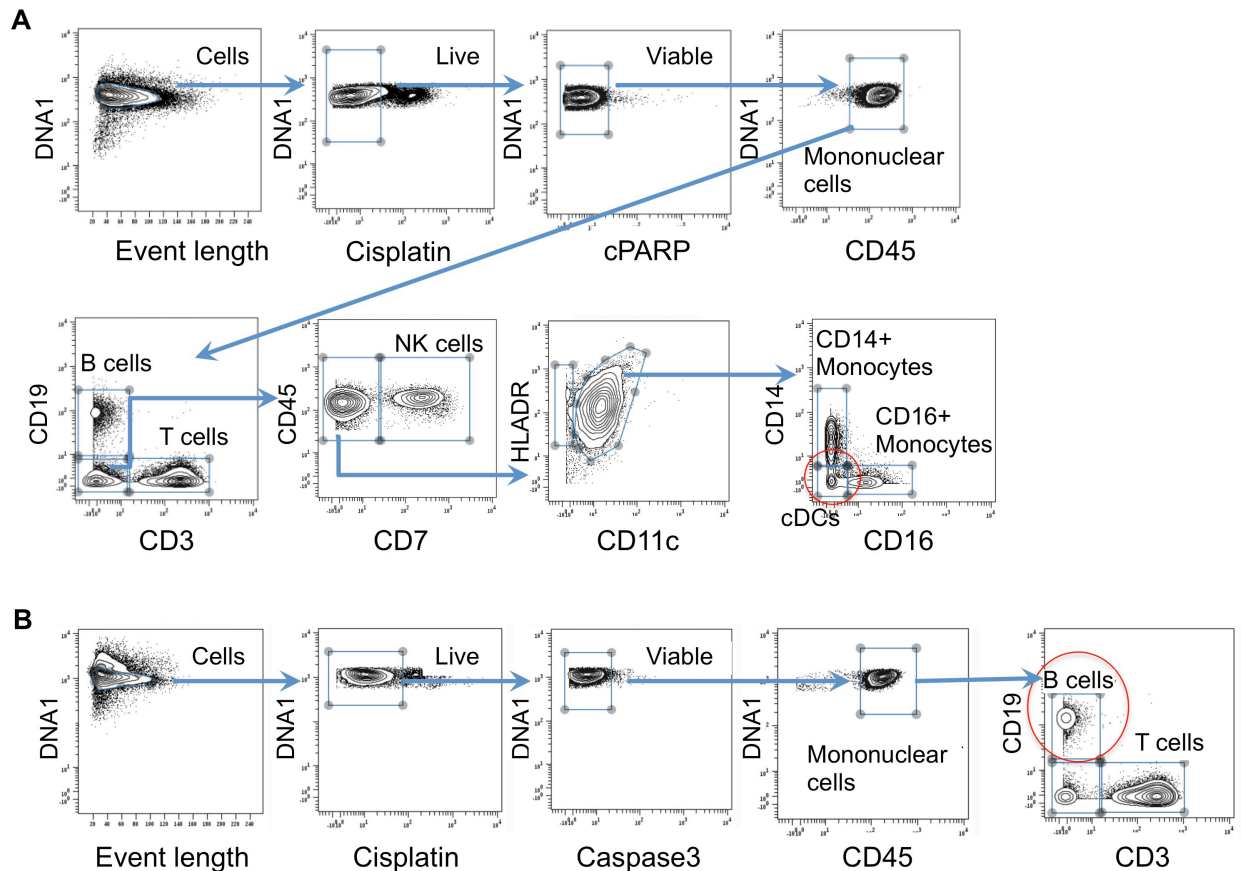

A schematic representation of the gating strategies used to define viable cells and immune cells types. **(A)** Gating for classical dendritic cells (cDC), used in the experiment shown in Figure 2D. **(B)** Gating for B-cells, used in the experiments shown in Figure 4E, F. Data are from representative samples. Gates and plots were created using cytobank.org. Live cells were gated by Cisplatin then viable cells were further gated by cPARP (A) or by Caspase 3 (B). NK cells: natural killer cells, cDC: classical dendritic cells, cPARP: cleaved PARP.

**Supplemental Figure 2: HERV-K dUTPase and apoptosis in pulmonary arterial endothelial cell (PAEC) and monocyte co-cultures, IL6 antibody efficacy, HERV-K dUTPase and PASM C proliferation, lipopolysaccharide (LPS) and HERV-K dUTPase mRNA in PAEC, and in PAH vs. control iPSC-EC, PAEC and PASM C.**

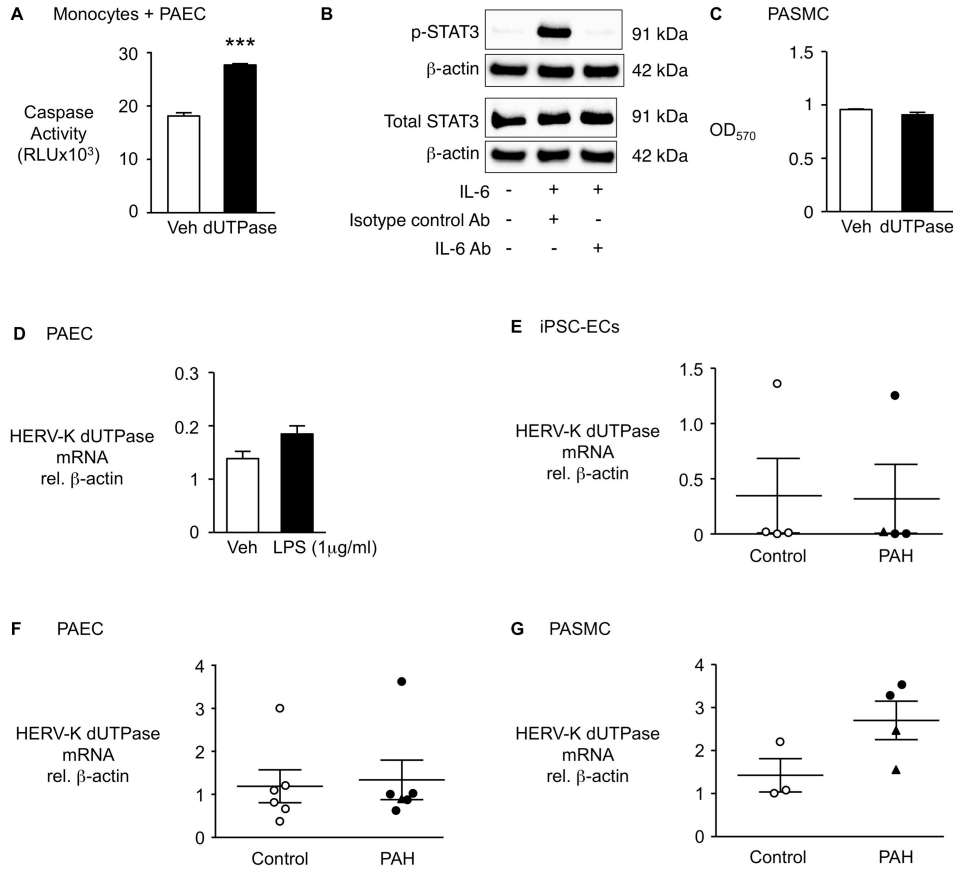

**(A)** Monocytes were treated with 10 μg/mL HERV-K dUTPase on a cell culture insert and then co-cultured with PAEC subjected to serum withdrawal media overnight (0% FBS). Apoptosis was assessed by Caspase-Glo 3/7 assay (n=3). **(B)** Corresponding to Figure 5B, the efficiency of neutralizing IL6 antibody was confirmed by blocking pSTAT3, assessed by immunoblot. **(C)** PASM C were treated with 10 μg/mL HERV-K dUTPase and proliferation was assessed by MTT assay (n=4) at 48 hr. **(D)** HERV-K dUTPase mRNA by qPCR in 1 μg/mL LPS-treated PAEC (n=3). **(E)** HERV-K dUTPase mRNA by qPCR in iPSC-EC from PAH patients (n=4) and controls (n=4). **(F)** HERV-K dUTPase mRNA by qPCR in PAEC from PAH patients (n=6) and controls (n=6). **(G)** HERV-K dUTPase mRNA by qPCR in PASM C from PAH patients (n=4) and controls (n=3). Ranges represent mean ± SEM (A, C-G). \*\*\*P<0.001 by Student's t-test. Closed symbols (PAH), open symbols (Controls), closed triangles hereditary PAH (HPAH).

**Supplemental Figure 3: HERV-K dUTPase does not affect left ventricular function or the number of pulmonary vessels in a rat model of pulmonary hypertension.**

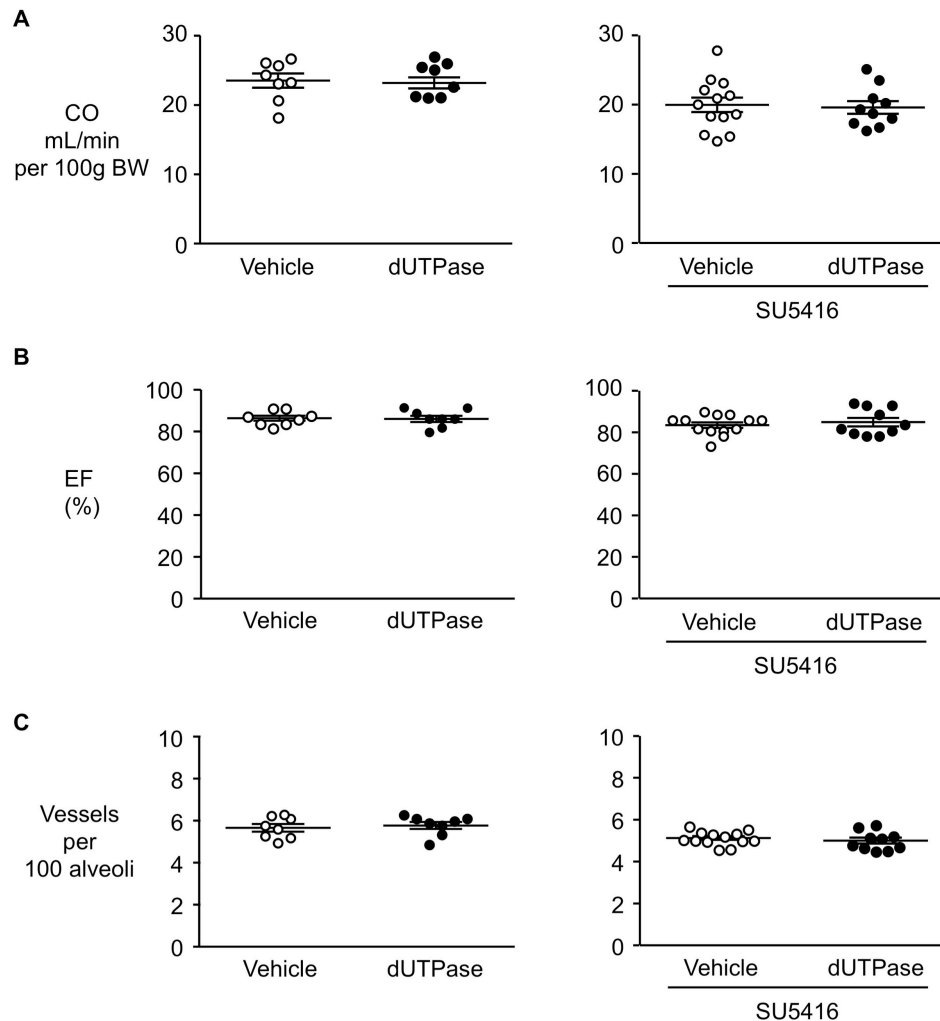

Rats were pre-treated with or without the VEGF receptor blocker SU5416 then subsequently given three weekly injections of HERV-K dUTPase or vehicle (saline). Saline (n=8), HERV-K dUTPase (n=8), SU5416+Saline (n=13) or SU5416+HERV-K dUTPase (n=10) as described for Figure 6. **(A)** Cardiac output (CO) and **(B)** ejection fraction (EF) were evaluated by echocardiogram. **(C)** Vessels and alveoli were counted in Movat-stained lung sections from the rats. Ranges represent mean  $\pm$  SEM. We found no significant difference between the groups by Student's t-test.

## Supplemental Material References

1. Sawada H, Saito T, Nickel NP, Alastalo TP, Glotzbach JP, Chan R, Haghghat L, Fuchs G, Januszyk M, Cao A, Lai YJ, Perez Vde J, Kim YM, Wang L, Chen PI, Spiekerkoetter E, Mitani Y, Gurtner GC, Sarnow P, Rabinovitch M. Reduced BMPR2 expression induces GM-CSF translation and macrophage recruitment in humans and mice to exacerbate pulmonary hypertension. *J Exp Med*. 2014;211:263-280.
2. Sa S, Gu M, Chappell J, Shao NY, Ameen M, Elliott KA, Li D, Grubert F, Li CG, Taylor S, Cao A, Ma Y, Fong R, Nguyen L, Wu JC, Snyder MP, Rabinovitch M. Induced pluripotent stem cell model of pulmonary arterial hypertension reveals novel gene expression and patient specificity. *Am J Respir Crit Care Med*. 2017;195:930-941.
3. Tojais NF, Cao A, Lai YJ, Wang L, Chen PI, Alcazar MAA, de Jesus Perez VA, Hopper RK, Rhodes CJ, Bill MA, Sakai LY, Rabinovitch M. Codependence of bone morphogenetic protein receptor 2 and transforming growth factor-beta in elastic fiber assembly and its perturbation in pulmonary arterial hypertension. *Arterioscler Thromb Vasc Biol*. 2017;37:1559-1569.
4. Gu M, Shao NY, Sa S, Li D, Termglinchan V, Ameen M, Karakikes I, Sosa G, Grubert F, Lee J, Cao A, Taylor S, Ma Y, Zhao Z, Chappell J, Hamid R, Austin ED, Gold JD, Wu JC, Snyder MP, Rabinovitch M. Patient-specific ipsc-derived endothelial cells uncover pathways that protect against pulmonary hypertension in BMPR2 mutation carriers. *Cell Stem Cell*. 2017;20:490-504 e495.

5. Ariza ME, Williams MV. A human endogenous retrovirus k dutpase triggers a th1, th17 cytokine response: Does it have a role in psoriasis? *J Invest Dermatol.* 2011;131:2419-2427.
6. Lawrie A, Spiekerkoetter E, Martinez EC, Ambartsumian N, Sheward WJ, Maclean MR, Harmar AJ, Schmidt AM, Lukanidin E, Rabinovitch M. Interdependent serotonin transporter and receptor pathways regulate s100a4/mts1, a gene associated with pulmonary vascular disease. *Circ Res.* 2005;97:227-235.
7. Tuominen VJ, Ruotoistenmaki S, Viitanen A, Jumppanen M, Isola J. Immunoratio: A publicly available web application for quantitative image analysis of estrogen receptor (er), progesterone receptor (pr), and ki-67. *Breast Cancer Res.* 2010;12:R56.
8. Wisniewski JR, Zougman A, Nagaraj N, Mann M. Universal sample preparation method for proteome analysis. *Nat Methods.* 2009;6:359-362.
9. Roxas BA, Li Q. Significance analysis of microarray for relative quantitation of lc/ms data in proteomics. *BMC Bioinformatics.* 2008;9:187.
10. Greninger AL, Chen EC, Sittler T, Scheinerman A, Roubinian N, Yu G, Kim E, Pillai DR, Guyard C, Mazzulli T, Isa P, Arias CF, Hackett J, Schochetman G, Miller S, Tang P, Chiu CY. A metagenomic analysis of pandemic influenza a (2009 h1n1) infection in patients from north america. *PLoS One.* 2010;5:e13381.
11. Naccache SN, Federman S, Veeraraghavan N, Zaharia M, Lee D, Samayoa E, Bouquet J, Greninger AL, Luk KC, Enge B, Wadford DA, Messenger SL, Genrich GL, Pellegrino K, Grard G, Leroy E, Schneider BS, Fair JN, Martinez MA, Isa P,

- Crump JA, DeRisi JL, Sittler T, Hackett J, Jr., Miller S, Chiu CY. A cloud-compatible bioinformatics pipeline for ultrarapid pathogen identification from next-generation sequencing of clinical samples. *Genome Res.* 2014;24:1180-1192.
12. Pavlidis P, Noble WS. Matrix2png: A utility for visualizing matrix data. *Bioinformatics.* 2003;19:295-296.
  13. Gaudilliere B, Fragiadakis GK, Bruggner RV, Nicolau M, Finck R, Tingle M, Silva J, Ganio EA, Yeh CG, Maloney WJ, Huddleston JI, Goodman SB, Davis MM, Bendall SC, Fantl WJ, Angst MS, Nolan GP. Clinical recovery from surgery correlates with single-cell immune signatures. *Sci Transl Med.* 2014;6:255ra131.
  14. Fienberg HG, Simonds EF, Fantl WJ, Nolan GP, Bodenmiller B. A platinum-based covalent viability reagent for single-cell mass cytometry. *Cytometry A.* 2012;81:467-475.
  15. Bendall SC, Simonds EF, Qiu P, Amir el AD, Krutzik PO, Finck R, Bruggner RV, Melamed R, Trejo A, Ornatsky OI, Balderas RS, Plevritis SK, Sachs K, Pe'er D, Tanner SD, Nolan GP. Single-cell mass cytometry of differential immune and drug responses across a human hematopoietic continuum. *Science.* 2011;332:687-696.
